# Supplementary material for: Silicon mitigates the adverse effects of drought on Lolium perenne physiological, morphometric and anatomical characters
Source: PeerJ. 2025 Feb 12;13:e18944. doi: 10.7717/peerj.18944 (PMC11829632; doi:10.7717/peerj.18944)
Supplement: Supplemental Information 1 — Fs – steady-state chlorophyll fluorescence yields (relative units) , Fm′ – maximal fluorescence signal (relative units), ΦPSII – quantum efficiency of photosystem II (relative units), ETR– photosynthetic electron transport rate (μmol m–2 s–1), NBI – nitrogen balance index (Dualex units), Chl – content of chlorophyll (Dualex units), Flv – content of flavonols (Dualex units), RWC – relative water content (%), SN – number of shoots (pcs.), SDM – shoot dry mass (g plant–1), RDM – root dry mass (g plant–1), RD – average diameter (mm), RL – root length (m), RA – root area (cm2), SRL – specific root length (m g–1), R:S – ratio of the root mass to the shoot mass. [file peerj-13-18944-s001.xlsx]

## Sheet: Arkusz1
Cvs	Term	Si	Water cond.	Pot	SN	SDM	RDM	RD	RL	RA	SRL	R:S	Fs	Fm'	ΦPSII	ETR	NBI	Chl	Flv	RWC		Fs– steady-state chlorophyll fluorescence yields (relative units)
1	1	1	1	1	14	0.0757188	0.0775	0.505	4.29298	64.5247	55.3933	1.02352	713.75	2286.75	0.69825	84.8449	62.95	39.5675	0.63	85.8754		Fm'– maximal fluorescence signal (relative units)
1	1	1	1	2	14.75	0.0699063	0.072125	0.450654	3.90913	55.1175	54.1993	1.03174	674.125	2262.5	0.68875	83.1333	67.8325	40.925	0.645	88.9091		ΦPSII– quantum efficiency of photosystem II (relative units)
1	1	1	1	3	14.5	0.0625625	0.070375	0.50184	4.67684	73.932	66.456	1.12488	634.5	2238.25	0.6955	86.6363	63.625	41.35	0.6575	86.143		ETR– photosynthetic electron transport rate (μmol m–2 s–1)
1	1	2	1	13	13.25	0.0719286	0.065	0.44358	4.84034	67.035	74.4668	0.903674	608.25	2079	0.70475	85.746	73.525	42.775	0.565	94.5		NBI – nitrogen balance index (Dualex units)
1	1	2	1	14	14.25	0.0787812	0.07875	0.483957	5.32207	81.0967	67.5819	0.999603	637	2114.75	0.6975	84.2226	76.85	44.3	0.6175	93.5759		Chl – content of chlorophyll (Dualex units)
1	1	2	1	15	14	0.0671071	0.0642857	0.447933	4.68058	65.901	72.809	0.957956	679.5	2164.5	0.68275	85.1376	69.1675	41.525	0.5975	91.1375		Flv – content of flavonols (Dualex units),
1	2	1	1	4	25.25	0.15975	0.145	0.337556	9.87499	108.665	68.1034	0.907668	735.25	2144.5	0.66675	87.0909	68.225	40.5	0.62	94.611		RWC – relative water content (%)
1	2	1	1	5	22	0.15375	0.1385	0.373686	9.08435	113.148	65.591	0.900813	775.75	2191.75	0.6585	83.7889	66.5	42.15	0.64	85.7777		SN – number of shoots (pcs.)
1	2	1	1	6	23.25	0.153875	0.118625	0.322193	10.6656	104.181	66.8472	0.770918	741	2409.5	0.691	80.9714	60.55	40	0.6375	90.536		SDM – shoot dry mass (g plant–1)
1	2	2	1	16	26.125	0.159969	0.1315	0.346578	11.4528	132.652	87.0938	0.822036	795.5	2640	0.692	88.6664	87.25	35.3	0.4375	93.5604		RDM – root dry mass (g plant–1)
1	2	2	1	17	22	0.168125	0.127	0.394	11.936	129.568	93.9845	0.75539	752	2220.25	0.67925	88.2962	91.45	34.675	0.385	96.2511		RD – average diameter (mm)
1	2	2	1	18	26	0.171875	0.136	0.394055	10.9696	135.737	80.6591	0.791273	718.333	2364	0.701333	87.1898	96.7	37.35	0.385	93.9956		RL – root length (m)
1	3	1	1	7	40	0.623667	0.447	0.385023	37.4343	440.853	83.7456	0.716729	813.25	2478.25	0.6575	79.5312	53.2	37.875	0.6825	87.474		RA – root area (cm2)
1	3	1	1	8	37	0.727619	0.437714	0.378294	35.3011	408.234	80.6488	0.601571	727.5	2549	0.688	89.573	47.4667	34.725	0.695	85.8595		SRL – specific root length (m g–1)
1	3	1	1	9	41.625	0.602833	0.386625	0.378969	36.3677	318.087	94.0646	0.641346	705.25	2372.5	0.70225	87.3037	46.575	34.875	0.7475	86.2305		R:S – ratio of the root mass to the shoot mass
1	3	2	1	19	39	0.652534	0.415143	0.362643	34.7577	405.241	83.7246	0.636201	744.75	2241.25	0.66625	80.5896	40.35	28.7667	0.7375	87.6967
1	3	2	1	20	35	0.602833	0.424375	0.33744	35.7964	365.224	84.351	0.703967	655.5	2138	0.689	89.5631	41.9333	29.4	0.7175	89.2091
1	3	2	1	21	42	0.737321	0.390286	0.346836	35.2771	280.844	90.3878	0.670084	691.5	2358	0.68625	85.3146	43.3333	29	0.715	84.1924
1	4	1	1	10	58	0.754548	1.00017	0.404181	140.47	1700.2	118.797	1.32552	919.667	2302	0.646	78.1402	21.8125	19.1333	0.943333	82.0489
1	4	1	1	11	51.3333	0.809095	1.25843	0.393169	138.35	1670.04	109.939	1.55535	1035.75	2445.33	0.63	81.4741	23.3425	19.5467	0.916667	84.7019
1	4	1	1	12	46.75	0.7	1.07038	0.364456	136.638	1548.17	114.368	1.52911	1042	2300.25	0.622667	77.4099	23.425	19.875	1.0875	85.0341
1	4	2	1	22	46	0.770922	1.14625	0.406722	117.391	1321.16	102.413	1.48686	1062.75	2429.33	0.6425	83.9233	22.275	19.4	0.983333	83.6176
1	4	2	1	23	40.75	0.837768	1.12971	0.420345	120.798	1430.67	106.928	1.34848	917.25	2132	0.629667	82.2471	22.25	20.525	0.85	84.7772
1	4	2	1	24	55.6667	0.700594	1.09688	0.3853	124.205	1495.48	113.235	1.56564	1056.75	2397.25	0.600333	84.719	22.85	18.85	0.99	87.6228
1	1	1	2	25	11.6667	0.0617857	0.0435714	0.639433	2.67448	70.7612	61.3816	0.705202	647.333	1901.33	0.653333	57.8984	63.1	43.1	0.726667	86.4799
1	1	1	2	26	12	0.0565	0.057375	0.588425	3.46425	56.5996	60.3791	0.83243	685.5	1941	0.64425	72.2462	57.75	41.75	0.77	87.8495
1	1	1	2	27	14	0.0669583	0.052	0.667019	2.55163	51.8069	49.0698	0.776602	692.75	2099	0.668	73.6451	58.1667	41.825	0.78	86.7883
1	1	2	2	37	13	0.0750952	0.0758571	0.45738	4.23243	60.9985	55.7947	1.01015	676.333	1958.67	0.653333	61.8849	61.1	39.0667	0.643333	89.0682
1	1	2	2	38	11.3333	0.062619	0.067	0.47408	3.98189	59.0394	59.4312	1.06996	764.333	2144.67	0.640333	63.8291	58.3667	39.7	0.603333	89.2215
1	1	2	2	39	12	0.0688571	0.069	0.49552	4.39267	67.5022	63.6619	1.00207	690	2125.75	0.67425	67.9644	58.475	39.1667	0.6475	89.0389
1	2	1	2	28	13.3333	0.0755	0.06275	0.372729	4.22352	48.3148	67.307	0.831126	621.75	755	0.17325	16.5904	31.075	24.15	0.8375	53.9277
1	2	1	2	29	11.6667	0.0685417	0.055	0.37658	4.09869	48.1908	74.5216	0.802432	524	750.667	0.1475	17.1906	33.6667	28.8333	0.873333	55.2777
1	2	1	2	30	10	0.0662812	0.067	0.365943	4.37855	49.4552	65.3515	1.01084	523	637.5	0.12175	12.2724	33.25	26.35	0.8025	46.0447
1	2	2	2	40	11.75	0.0674687	0.093375	0.355314	4.40897	58.4525	47.2179	1.38397	442.5	585.25	0.23775	23.9652	39.875	39.575	0.7425	52.5733
1	2	2	2	41	9.33333	0.0657083	0.086625	0.347988	4.61747	67.7459	53.3041	1.31833	462.667	514.667	0.0996667	21.3528	42.5333	37.5333	0.785	50.3841
1	2	2	2	42	10.25	0.0961875	0.083	0.376	4.64602	63.7872	55.9761	1.1884	477.75	613.75	0.21625	21.798	37.5	36.175	0.816667	45.4806
1	3	1	2	31	12.25	0.0301	0.065	0.340156	7.01117	74.0175	107.864	2.15947	413.525	415.2	0.00303333	0.244608	14.26	12.6867	0.85	28.4805
1	3	1	2	32	10.25	0.0285469	0.0635	0.360833	5.9183	62.2191	93.2016	2.22441	458.5	498	0.01625	0.392416	13.475	10.425	0.805	25.0403
1	3	1	2	33	10.5	0.0296438	0.06425	0.32568	6.46473	90.628	100.618	2.1674	414.5	456.6	0.00525	0.540225	10.425	8	0.7875	32.3535
1	3	2	2	43	11.5	0.0293563	0.0845	0.339133	6.51517	68.8416	77.1026	2.87843	325.5	329.25	0.0045	0.461265	16.35	12.85	0.7725	25.1711
1	3	2	2	44	11.5	0.0299188	0.077625	0.360464	5.65655	70.1815	72.8702	2.59453	322.25	329.25	0.0045	0.43092	14.175	10.5667	0.7375	28.5965
1	3	2	2	45	12	0.028325	0.073625	0.364483	5.65819	63.609	76.8515	2.59929	349	352.25	0.00275	0.446093	17.275	16.825	0.843333	27.8972
1	4	1	2	34	14.75	0.0730714	0.0917143	0.46001	7.26205	105.686	79.1813	1.25513	462	1637	0.717	42.0317	27.7	13.2	0.61	38.7208
1	4	1	2	35	17	0.0641429	0.108857	0.420577	9.5208	124.901	87.4614	1.34517	367	1315	0.72	35.9516	26	13.9	0.59	37.536
1	4	1	2	36	24	0.0849286	0.092	0.4026	7.11817	115.293	77.3714	1.08326	568.5	1546	0.66225	48.1118	25.075	15.025	0.5775	40.4345
1	4	2	2	46	14.95	0.0732381	0.106571	0.357771	10.4191	126.783	95.766	1.45514	474.333	1532.67	0.692	52.3152	25.325	15.025	0.4425	67.4242
1	4	2	2	47	20	0.0914444	0.109	0.372146	10.2149	119.185	93.715	1.46704	459.5	1487	0.6915	54.4937	25.625	14.75	0.4625	54.2594
1	4	2	2	48	16.5	0.0714286	0.125286	0.372085	10.8962	134.38	88.9711	1.754	493.667	1645.67	0.697333	56.6723	25.475	14.8875	0.5	50.3307
2	1	1	1	1	12	0.0565	0.048625	0.42452	3.12874	41.7829	64.3443	0.860619	659.75	2214.75	0.699	84.551	61.9	43.225	0.6175	86.2935
2	1	1	1	2	11.75	0.0539688	0.04075	0.446033	2.66527	37.4489	65.4055	0.755067	564.75	2031.5	0.72	86.184	55.2	42.8667	0.7075	88.5559
2	1	1	1	3	12.25	0.055875	0.034	0.409475	2.89706	37.4149	85.2076	0.608501	698.75	2305	0.69575	83.6749	62.9	42	0.67	87.2489
2	1	2	1	13	12.5	0.0533125	0.042	0.411	3.22455	39.4215	76.775	0.787808	687.5	2049.5	0.66125	80.3331	60.65	37.975	0.625	85.8015
2	1	2	1	14	12.25	0.0586786	0.0485714	0.4237	3.43481	45.6473	70.7166	0.827754	639.5	2305.25	0.723	80.4699	67.025	42.7	0.6475	89.3206
2	1	2	1	15	13.25	0.0660625	0.05025	0.418094	3.39807	43.761	67.6232	0.760643	665.25	2181.75	0.69525	80.5864	69.55	41.365	0.5925	89.9784
2	2	1	1	4	21	0.17375	0.115375	0.354107	9.93738	109.937	86.1311	0.664029	732	2251.25	0.6735	82.0323	59.325	33.7	0.5775	87.8327
2	2	1	1	5	19.25	0.17793	0.115375	0.318338	12.5158	127.124	83.6258	0.648431	766.5	2156.5	0.639	83.4662	57.9	37.025	0.655	88.9013
2	2	1	1	6	18.5	0.182109	0.111346	0.310458	9.03243	87.1023	81.1205	0.611424	737.75	2153.5	0.654	80.9613	54.3	33.1	0.6425	86.3325
2	2	2	1	16	19.75	0.180619	0.183143	0.383764	12.4116	144.549	93.7985	1.01397	780.75	2196.5	0.6395	80.3754	56.575	31.85	0.56	85.4057
2	2	2	1	17	21.5	0.187917	0.19775	0.371144	17.0785	198.313	87.364	1.05233	722	2292.5	0.68175	83.0371	57.725	35.8	0.6225	87.0948
2	2	2	1	18	19.75	0.159667	0.159571	0.331586	16.1539	164.409	100.233	0.999404	737.5	2211	0.66525	86.1531	60.7	36.95	0.6125	86.4906
2	3	1	1	7	23.75	0.611861	0.161875	0.429604	11.6498	155.991	71.9681	0.264562	775.5	2371.75	0.67325	81.4363	57.5	37.4	0.65	85.916
2	3	1	1	8	34.25	0.550594	0.198125	0.405766	16.7385	211.505	84.4846	0.359839	866	2321	0.62625	78.3815	50.225	34.075	0.7075	87.4556
2	3	1	1	9	30.25	0.529531	0.234375	0.4547	11.5678	152.235	78.2264	0.442608	817.75	2281	0.638	79.8521	57.525	34.775	0.605	86.3273
2	3	2	1	19	26.125	0.52675	0.297857	0.413214	19.548	252.821	65.6288	0.565462	738	2484.25	0.7015	78.0769	47.15	31.275	0.6375	84.2535
2	3	2	1	20	22.75	0.584679	0.265571	0.403445	19.515	196.627	73.4832	0.454218	831	2598.25	0.6795	79.9092	41.025	29.075	0.615	85.4532
2	3	2	1	21	22.25	0.599946	0.326286	0.392655	19.4821	230.035	69.556	0.543858	717.25	2592.75	0.7225	87.2455	44.875	27.25	0.605	87.2754
2	4	1	1	10	36	0.543906	1.23612	0.400017	101.451	1258.07	82.0717	2.27268	903.75	2681.12	0.66425	85.3825	31.7	24.55	0.8725	84.401
2	4	1	1	11	41.25	0.672875	1.13613	0.380715	106.916	1257.19	94.1062	2.00234	1035.5	2586.25	0.59975	84.6367	31.1	25.6	0.6975	82.5765
2	4	1	1	12	35	0.579762	1.18613	0.380304	104.184	1257.63	87.8353	2.04588	995.75	2588	0.61725	74.1126	25.65	22.775	0.77	85.2059
2	4	2	1	22	39	0.768619	1.32786	0.417054	119.824	1514.83	90.2386	1.72759	969.75	2566.25	0.61975	78.2697	24.9	19.75	0.8	83.0073
2	4	2	1	23	37	0.729095	1.35957	0.378407	119.27	1523.19	87.7262	1.86474	1041.25	2412	0.61325	74.2248	22.85	21.325	0.965	84.0799
2	4	2	1	24	41.75	0.824286	1.30814	0.414139	118.716	1531.56	90.7518	1.72644	878.75	2432.42	0.60675	85.6246	27.525	19.05	0.8825	85.4978
2	1	1	2	25	10.75	0.0478393	0.0515714	0.40532	3.4242	43.5924	66.3972	1.07801	672	2094	0.67625	79.527	64.525	41.525	0.68	86.4678
2	1	1	2	26	11	0.0489714	0.06675	0.4131	3.39188	43.6492	50.8147	1.14531	546.25	1909.25	0.71375	79.7401	59.15	41.45	0.765	87.4889
2	1	1	2	27	10.75	0.065	0.0646667	0.4152	2.99162	38.9513	46.2621	0.994872	644.25	2181.25	0.70325	78.5671	63.425	39.075	0.6325	85.3289
2	1	2	2	37	7.25	0.0583333	0.0636667	0.407	4.115	54.249	64.6335	1.09143	537.75	2187.12	0.66925	81.5146	50.525	35.4	0.6225	83.8797
2	1	2	2	38	10.5	0.0699583	0.0683958	0.4253	4.6388	61.5058	67.8229	0.977665	596.75	2140.5	0.72025	85.0039	57.175	38.675	0.69	86.7028
2	1	2	2	39	12.5	0.06	0.073125	0.424	3.59173	46.9921	66.2282	1.21875	567.25	2233.75	0.6865	89.1462	54	35.5	0.705	87.0301
2	2	1	2	28	11	0.0687222	0.063375	0.34902	4.12273	45.0921	65.0529	0.922191	445	493.75	0.2045	22.8913	32.45	27.275	1.2875	41.0226
2	2	1	2	29	10.5	0.0759167	0.066375	0.370667	5.50545	64.1617	69.6157	0.874314	419.25	532	0.2105	21.8162	31.025	21.8	1.2325	45.7309
2	2	1	2	30	10.75	0.0580653	0.073	0.364611	5.41504	61.5216	74.1786	1.25721	424	455.5	0.1805	16.6024	36	28.425	1.09	40.429
2	2	2	2	40	11.25	0.0755119	0.0787143	0.376	4.61284	61.2363	69.0678	1.04241	451.5	641.75	0.2905	23.4259	39.8	39.35	0.85	52.9828
2	2	2	2	41	12.25	0.0804844	0.0735	0.36147	4.6822	53.0077	63.7035	0.913221	477.75	673.75	0.29025	26.5222	41.175	38.55	0.805	51.2591
2	2	2	2	42	11	0.0779981	0.0818571	0.3606	6.0928	68.7123	74.4321	1.04948	445.75	676	0.27375	28.1689	44.575	36.2	0.7875	56.5964
2	3	1	2	31	9.25	0.0279917	0.055	0.38405	3.93332	46.4976	71.5148	1.96487	517.75	521.5	0.00525	0.58653	9.73333	12.4	0.8475	28.8451
2	3	1	2	32	8.75	0.0304833	0.060375	0.34819	5.07629	58.2489	84.0794	1.98059	597	599	0.00475	0.53571	13.475	10.425	0.9525	35.6279
2	3	1	2	33	9.5	0.0361171	0.0576875	0.36612	4.5048	52.3732	78.0898	1.84756	404	405.75	0.001	0.1218	10.425	10.275	0.7625	30.772
2	3	2	2	43	9.25	0.0364964	0.0968571	0.369713	6.3415	73.4991	65.4727	2.65388	508.5	510.25	0.00625	0.737625	16.35	12.85	0.7725	32.6833
2	3	2	2	44	10.5	0.0339571	0.0965714	0.385	6.35078	78.5648	65.7625	2.84392	513.75	516	0.003	0.35406	14.175	14.8375	0.8375	36.5443
2	3	2	2	45	9	0.0401111	0.0741667	0.33833	6.0342	59.9636	81.36	2.44894	427.5	429.75	0.003	0.35406	17.275	16.825	0.775	34.1575
2	4	1	2	34	3.5	0.0706786	0.118571	0.429	9.40312	139.072	79.3034	1.67761	644.25	2498.75	0.6335	67.9854	16.2833	6.51667	0.5425	59.6496
2	4	1	2	35	6.5	0.0607083	0.1065	0.412	10.0737	105.303	94.5885	1.75429	699	2043.5	0.66775	68.2182	18.2	6.8	0.366667	54.211
2	4	1	2	36	6	0.0694722	0.128375	0.465407	9.7384	122.187	75.859	1.84786	589.5	1947	0.650625	69.4659	14.3667	6.23333	0.43	57.6242
2	4	2	2	46	1.5	0.0657143	0.125	0.385	10.7021	133.358	92.1227	1.90217	644.25	2301	0.70825	71.3916	21.2063	14.8312	0.34	73.6247
2	4	2	2	47	4.08333	0.0653095	0.128	0.398	11.5782	135.835	90.455	1.9599	688.25	2253.75	0.69325	73.8316	28.325	12.3	0.4475	70.6477
2	4	2	2	48	6.5	0.0855238	0.122	0.394	12.2362	146.302	100.297	1.93104	653.05	2277.38	0.689833	72.3845	22.975	11.625	0.398	65.2806

## Sheet: Arkusz2
Term	Cultivar	Water and Si	high of the ridges	width of the ridges	distance between
		conditions	in the leaf (µm)	(µm)	the ridges (µm)
1	1	1_1	263.8 ±33.3	336.5 ±22.2	58.9 ±7.5
1	1	2_1	237.1 ±34.8	245.8 ±46,2	77.7 ±16.6
1	1	1_2	283.8 ±17.0	220.4 ±18.2	32.1 ±5.3
1	1	2_2	278.8 ±53.8	216.6 ±14.2	42.9 ±2.9
1	2	1_1	305.5 ±35.0	250.3 ±35.6	73.5 ±13.0
1	2	2_1	232.8 ±48.5	262.4 ±29.2	56.0 ±8.1
1	2	1_2	357.3 ±18.9	236.3 ±40.0	67.3 ±8.0
1	2	2_2	277.0 ±10.4	204.9 ±36.4	55.1 ±8.4
4	1	1_1	266.3 ±34.1	230.5 ±62.7	51.5 ±5.1
4	1	2_1	236.7 ±10.9	233.7 ±2.0	43.4 ±1.1
4	1	1_2	295.3 ±52.7	256.4 ±75.0	39.1 ±5.8
4	1	2_2	260.0 ±21.2	226.9 ±2.5	33.3 ±2.0
4	2	1_1	283.4 ±29.6	233.7 ±18.1	52.1 ±2.6
4	2	2_1	231.4 ±4.9	241.3 ±9.5	41.2 ±3.7
4	2	1_2	349.6 ±18.9	196.6 ±59.9	18.9 ±5.6
4	2	2_2	270.0 ±5.9	204.9 ±36.4	19.2 ±3.5
