# Supplementary material for: Silicon mitigates the adverse effects of drought on Lolium perenne physiological, morphometric and anatomical characters
Source: PeerJ. 2025 Feb 12;13:e18944. doi: 10.7717/peerj.18944 (PMC11829632; doi:10.7717/peerj.18944)
Supplement: Supplemental Information 3 — The mean values of features in columns, for individual terms, marked with the same lower-case letters did not differ significantly at p ≤ 0.05 Abbreviations: Fs – steady-state chlorophyll fluorescence yields (relative units), Fm′ – maximal fluorescence signal (relative units), ΦPSII – quantum efficiency of photosystem II (relative units), ETR – photosynthetic electron transport rate (μmol m–2 s–1), NBI – nitrogen balance index (Dualex units), Chl – content of chlorophyll (Dualex units), Flv – content of flavonols (Dualex units), RWC – relative water content (%), SN – number of shoots (pcs.), SDM – shoot dry mass (g plant–1), RDM – root dry mass (g plant–1), RD – average diameter (mm), RL – root length (m), RA – root area (cm2), SRL – specific root length (m g–1), R:S – ratio of the root mass to the shoot mass. [file peerj-13-18944-s003.docx]

**Table S2.** Detailed comparisons of means for individual terms (7, 14, 21 and 35 DAT).

| Cvs | Water conditions | Si application | F*s* | F*m'* | ΦPSII | ETR | NBI | Chl | Flv | RWC | SN | SDM | RDM | RD | RL | RA | SRL | R:S ratio |
| --- | --- | --- | --- | --- | --- | --- | --- | --- | --- | --- | --- | --- | --- | --- | --- | --- | --- | --- |
|  |  |  | 7 DAT | | | | | | | | | | | | | | | |
| Bokser | control | Si- | 674ab | 2263a | 0.694a | 84.9b | 64.8bc | 40.6b | 0.64a | 87.0a | 14.4c | 0.069ab | 0.073d | 0.486c | 4.29cd | 64.5c | 58.7a | 1.06b |
|  |  | Si+ | 642ab | 2119a | 0.695a | 85.0b | 73.2c | 42.9b | 0.59a | 93.1b | 13.8bc | 0.073b | 0.069d | 0.458abc | 4.95d | 71.3c | 71.6a | 0.95ab |
|  | drought | Si- | 675ab | 1980a | 0.655a | 67.9a | 59.7ab | 42.2b | 0.76b | 87.0a | 12.6abc | 0.062ab | 0.051abc | 0.632d | 2.90a | 59.7bc | 56.9a | 0.77a |
|  |  | Si+ | 710b | 2076a | 0.656a | 64.6a | 59.3ab | 39.3ab | 0.63a | 89.1ab | 12.1abc | 0.069ab | 0.071d | 0.476bc | 4.20bcd | 62.5c | 59.6a | 1.03b |
| Stadion | control | Si- | 641ab | 2184a | 0.705a | 84.8b | 60.0ab | 42.7b | 0.67ab | 87.4a | 12.0abc | 0.055ab | 0.041a | 0.427abc | 2.90a | 38.9a | 71.7a | 0.74a |
|  |  | Si+ | 664ab | 2179a | 0.693a | 80.5b | 65.7bc | 40.7b | 0.62a | 88.4a | 12.7abc | 0.059ab | 0.047ab | 0.418ab | 3.35abc | 42.9ab | 71.7a | 0.79a |
|  | drought | Si- | 621ab | 2062a | 0.698a | 79.3b | 62.4ab | 40.7b | 0.69ab | 86.4a | 10.8ab | 0.054a | 0.061bcd | 0.411a | 3.27ab | 42.1ab | 54.5a | 1.07b |
|  |  | Si+ | 567a | 2187a | 0.692a | 85.2b | 53.9a | 36.5a | 0.67ab | 85.9a | 10.1a | 0.063ab | 0.068cd | 0.419bc | 4.12bcd | 54.2abc | 66.2a | 1.10b |
|  |  |  | 14 DAT | | | | | | | | | | | | | | | |
| Bokser | control | Si- | 751b | 2249b | 0.672c | 84.0c | 65.1c | 40.9c | 0.63b | 90.3c | 23.5bc | 0.156b | 0.134b | 0.344a | 9.87b | 108.7b | 66.8b | 0.86ab |
|  |  | Si+ | 755b | 2408b | 0.691c | 88.1c | 91.8d | 35.8bc | 0.40a | 94.6c | 24.7c | 0.167b | 0.132b | 0.378a | 11.45b | 132.7bc | 87.2c | 0.79ab |
|  | drought | Si- | 556b | 714a | 0.148a | 15.4a | 32.7a | 26.4a | 0.84c | 51.8b | 11.7a | 0.070a | 0.062a | 0.372a | 4.23a | 48.7a | 69.1b | 0.88ab |
|  |  | Si+ | 461a | 571a | 0.185a | 22.4b | 40.0ab | 37.8bc | 0.78c | 49.5ab | 10.4a | 0.076a | 0.088a | 0.360a | 4.56a | 63.3a | 52.2a | 1.30c |
| Stadion | control | Si- | 745b | 2187b | 0.656c | 82.2c | 57.2c | 34.6b | 0.63b | 87.7c | 19.6b | 0.178b | 0.114b | 0.328a | 10.50b | 108.1b | 83.6c | 0.64a |
|  |  | Si+ | 747b | 2233b | 0.662c | 83.2c | 58.3c | 34.9bc | 0.60b | 86.3c | 20.3b | 0.176b | 0.180c | 0.362a | 15.21c | 169.1c | 93.8c | 1.02bc |
|  | drought | Si- | 429a | 494a | 0.199ab | 20.4ab | 33.2a | 25.8a | 1.20d | 42.4a | 10.8a | 0.068a | 0.068a | 0.361a | 5.01a | 56.9a | 69.6b | 1.02bc |
|  |  | Si+ | 458a | 664a | 0.285b | 26.0b | 41.9b | 38.0bc | 0.81c | 53.6b | 11.5a | 0.078a | 0.078a | 0.366a | 5.13a | 61.0a | 69.1b | 1.00b |
|  |  |  | 21 DAT | | | | | | | | | | | | | | | |
| Bokser | control | Si- | 749c | 2467cd | 0.683bc | 85.5b | 49.1bc | 35.8c | 0.71abc | 86.5c | 39.5c | 0.651b | 0.424d | 0.381ab | 36.37d | 389.1d | 86.2ab | 0.65b |
|  |  | Si+ | 697c | 2246b | 0.681bc | 85.2b | 41.9b | 29.1b | 0.73abcd | 87.0c | 38.7c | 0.664b | 0.410d | 0.349a | 35.28d | 350.4d | 86.2ab | 0.67b |
|  | drought | Si- | 429ab | 457a | 0.008a | 0.4a | 12.7a | 10.4a | 0.81cd | 28.6ab | 11.0a | 0.029a | 0.064a | 0.342a | 6.46a | 75.6ab | 100.6b | 2.18c |
|  |  | Si+ | 332a | 337a | 0.004a | 0.4a | 15.9a | 13.4a | 0.78cd | 27.2a | 11.7a | 0.029a | 0.079a | 0.355a | 5.94a | 67.5a | 75.6a | 2.69d |
| Stadion | control | Si- | 820c | 2325bc | 0.646b | 79.9b | 55.1c | 35.4c | 0.65ab | 86.6c | 29.4b | 0.564b | 0.198b | 0.430c | 13.32b | 173.2bc | 78.2a | 0.36a |
|  |  | Si+ | 762c | 2558d | 0.701c | 81.7b | 44.4b | 29.2b | 0.62a | 85.7c | 23.7b | 0.570b | 0.297c | 0.403bc | 19.52c | 226.5c | 69.6a | 0.52ab |
|  | drought | Si- | 506b | 509a | 0.004a | 0.4a | 11.2a | 11.0a | 0.85d | 31.7ab | 9.2a | 0.032a | 0.058a | 0.366ab | 4.50a | 52.4a | 77.9a | 1.93c |
|  |  | Si+ | 483ab | 485a | 0.004a | 0.5a | 15.9a | 14.8a | 0.80cd | 34.5b | 9.6a | 0.037a | 0.089a | 0.364ab | 6.24a | 70.7a | 70.9a | 2.65d |
|  |  |  | 35 DAT | | | | | | | | | | | | | | | |
| Bokser | control | Si- | 999c | 2349bc | 0.633a | 79.0cd | 22.9b | 19.5c | 0.98c | 83.9d | 52.0e | 0.755c | 1.110b | 0.387ab | 138.49d | 1639.5d | 114.4c | 1.47ab |
|  |  | Si+ | 1012c | 2320bc | 0.624a | 83.6d | 22.5b | 19.6c | 0.94c | 85.3d | 47.5de | 0.770c | 1.124b | 0.404ab | 120.80c | 1415.8c | 107.5bc | 1.47ab |
|  | drought | Si- | 466a | 1499a | 0.700b | 42.0a | 26.3bc | 14.0b | 0.59ab | 38.9a | 18.6c | 0.074a | 0.098a | 0.428b | 7.97a | 115.3a | 81.3a | 1.23a |
|  |  | Si+ | 476ab | 1555a | 0.694b | 54.5b | 25.5bc | 14.9b | 0.47a | 57.3b | 17.2bc | 0.079a | 0.114a | 0.367a | 10.51a | 126.8a | 92.8ab | 1.56ab |
| Stadion | control | Si- | 978c | 2618c | 0.627a | 81.4d | 29.5c | 24.3d | 0.78bc | 84.1d | 37.4d | 0.599b | 1.186bc | 0.387ab | 104.18b | 1257.6b | 88.0a | 2.11d |
|  |  | Si+ | 963c | 2470bc | 0.613a | 79.4cd | 25.1bc | 20.0c | 0.88c | 84.2d | 39.3d | 0.774c | 1.332c | 0.403ab | 119.27c | 1523.2cd | 89.6a | 1.77bc |
|  | drought | Si- | 644ab | 2163b | 0.651ab | 68.6c | 16.3a | 6.5a | 0.45a | 57.2b | 5.3ab | 0.067a | 0.118a | 0.435b | 9.74a | 122.2a | 83.3a | 1.76bc |
|  |  | Si+ | 662b | 2277bc | 0.697b | 72.5cd | 24.2bc | 12.9b | 0.40a | 69.9c | 4.0a | 0.072a | 0.125a | 0.392ab | 11.51a | 138.5a | 94.3ab | 1.93cd |

The mean values of features in columns for individual terms marked with the same lower-case letters did not differ significantly at p≤0.05.

Abbreviations: F*s*– steady-state chlorophyll fluorescence yields (relative units), F*m*'– maximal fluorescence signal (relative units), ΦPSII– quantum efficiency of photosystem II (relative units), ETR– photosynthetic electron transport rate (μmol m–2 s–1), NBI – nitrogen balance index (Dualex units), Chl – content of chlorophyll (Dualex units), Flv – content of flavonols (Dualex units), RWC – relative water content (%), SN – number of shoots (pcs.), SDM – shoot dry mass (g plant–1), RDM – root dry mass (g plant–1), RD – average diameter (mm), RL – root length (m), RA – root area (cm2), SRL – specific root length (m g–1), R:S – ratio of the root mass to the shoot mass.
